# Supplementary material for: Multi-omics gut microbiome signatures in obese women: role of diet and uncontrolled eating behavior
Source: Springer Nature journal article supplement (doi:10.1186/s12916-022-02689-3), 2022-12-27
Supplement: MOESM1 [file 23861190]

## **Multi-omics gut microbiome signatures in obese women: role of diet and uncontrolled eating behavior**

Monica Barone,<sup>a,b†</sup> Silvia Garelli,<sup>c†</sup> Simone Rampelli,<sup>b</sup> Alessandro Agostini,<sup>d</sup> Silke Matysik,<sup>e</sup> Federica D'Amico,<sup>a,b</sup> Sabrina Krautbauer,<sup>e</sup> Roberta Mazza,<sup>f</sup> Nicola Salituro,<sup>c</sup> Flaminia Fanelli,<sup>c</sup> Patricia Iozzo,<sup>g</sup> Yolanda Sanz,<sup>h</sup> Marco Candela,<sup>b</sup> Patrizia Brigidi,<sup>a</sup> Uberto Pagotto,<sup>c</sup> Silvia Turroni<sup>b,\*</sup>

<sup>a</sup>*Microbiomics Unit, Department of Medical and Surgical Sciences, University of Bologna, Bologna 40138, Italy*

<sup>b</sup>*Unit of Microbiome Science and Biotechnology, Department of Pharmacy and Biotechnology, University of Bologna, Bologna 40126, Italy*

<sup>c</sup>*Unit of Endocrinology and Prevention and Care of Diabetes, Center for Applied Biomedical Research, S. Orsola Polyclinic, Istituto di Ricovero e Cure a Carattere Scientifico (IRCCS), Department of Medical and Surgical Sciences, University of Bologna, Bologna 40138, Italy*

<sup>d</sup>*Department of Experimental, Diagnostic, and Specialty Medicine, S. Orsola Polyclinic, Istituto di Ricovero e Cure a Carattere Scientifico (IRCCS), University of Bologna, Bologna 40138, Italy*

<sup>e</sup>*Institute of Clinical Chemistry and Laboratory Medicine, University Hospital Regensburg, Regensburg 93053, Germany*

<sup>f</sup>*Present address: Research Development - Life Sciences and Bioeconomy Unit, Research Services Division (ARIC), University of Bologna, Bologna 40126, Italy*

<sup>g</sup>*Institute of Clinical Physiology, National Research Council, Pisa 56124, Italy*

<sup>h</sup>*Microbial Ecology, Nutrition & Health Research Unit, Institute of Agrochemistry and Food Technology, Spanish National Research Council (IATA-CSIC), Valencia 46980, Spain*

† These authors contributed equally to this work.

\* Address correspondence to Dr. Silvia Turroni, [silvia.turroni@unibo.it](mailto:silvia.turroni@unibo.it)

## Supplementary Material

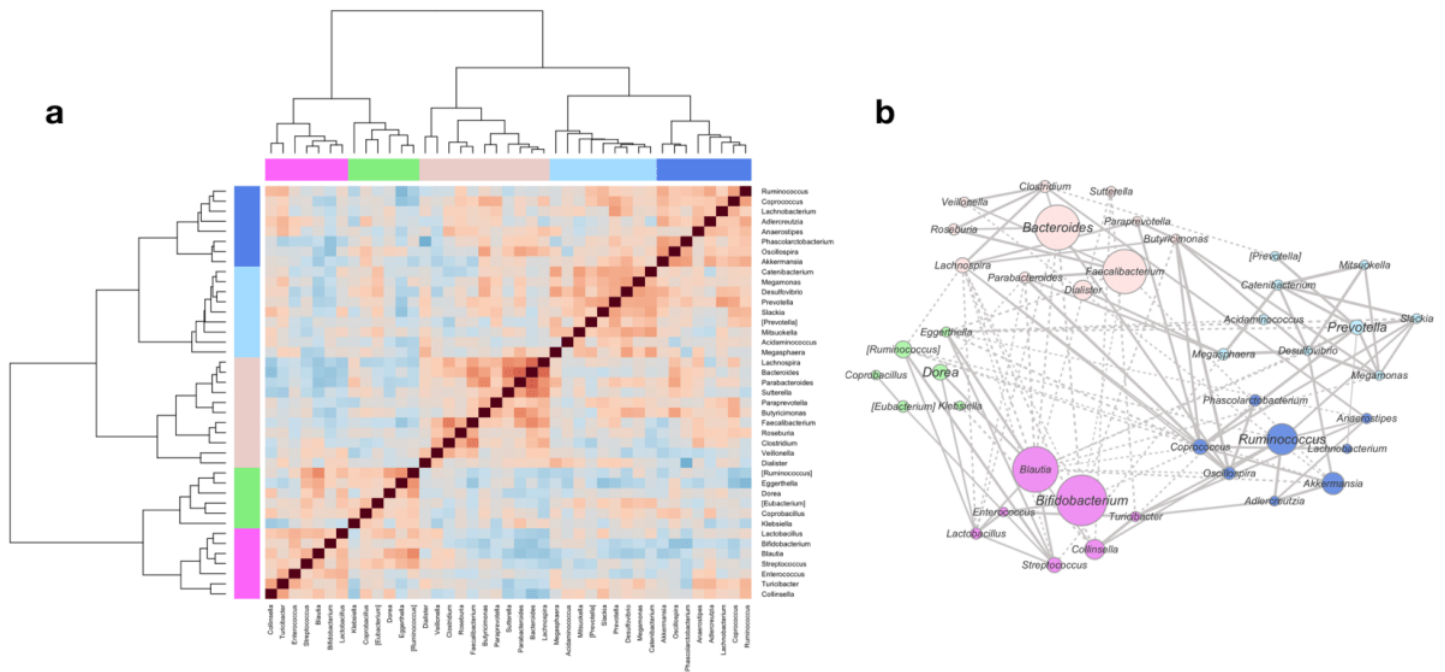

**Figure S1. Assignment of bacterial co-abundance groups (CAGs).** CAGs were assigned according to the heat plot (a) showing Kendall correlations between genera clustered by the Spearman correlation coefficient and Ward linkage hierarchical clustering. (b) Wiggum plot correlation between the five CAGs identified. Circle size is proportional to the genus relative abundance and the connections between nodes represent significant correlations between genera (Kendall, FDR < 0.05). Positive correlations are represented by continuous lines, while negative correlations are represented by dashed lines. Thickness of the lines is proportional to the significance of the correlation.

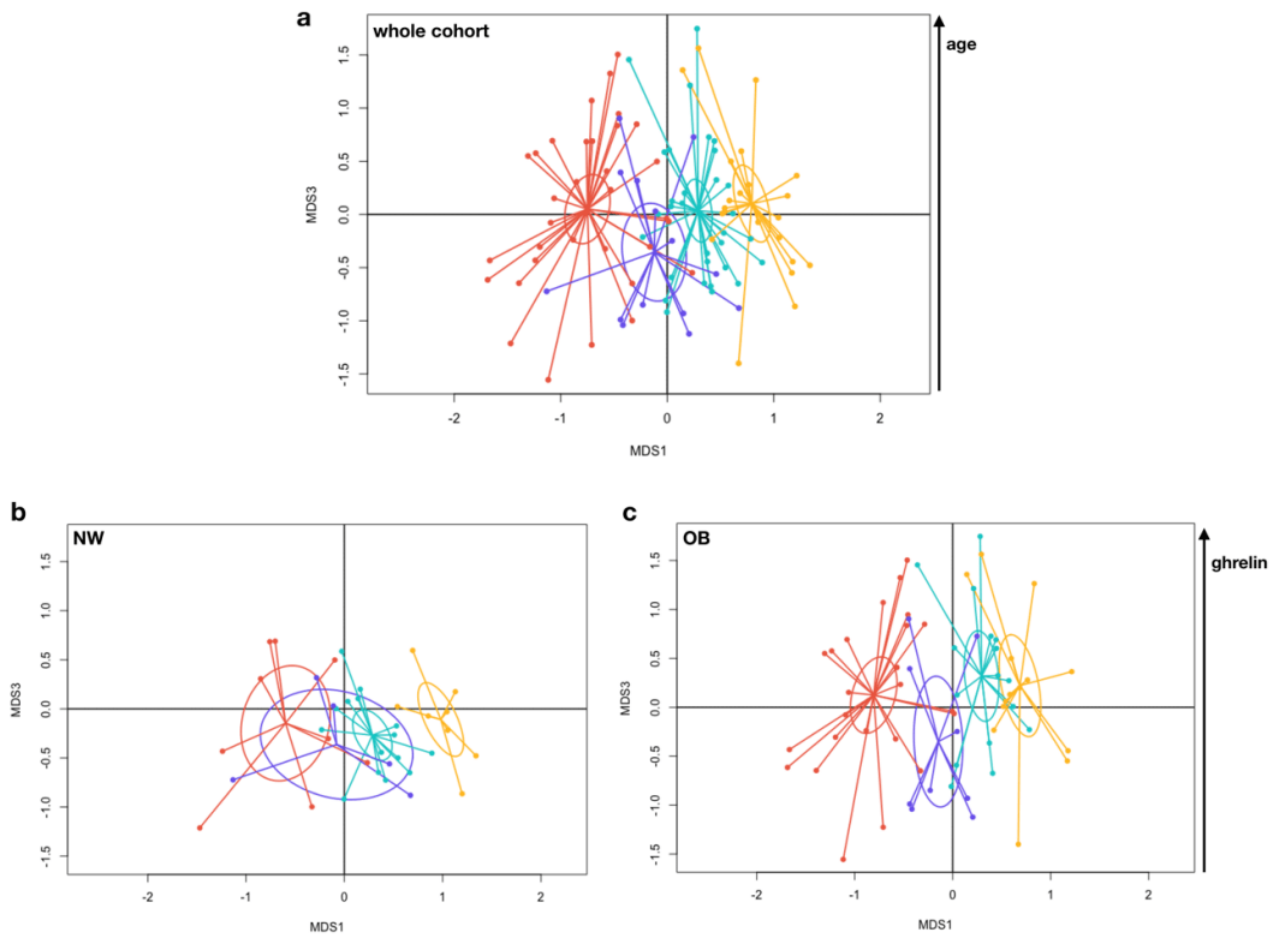

**Figure S2. Associations of the microbiota profiles with host metadata.** Unweighted UniFrac PCoA of the fecal microbiota in the whole cohort (a), as well as in normal-weight women (NW, b) and overweight/obese women (OB, c), stratified according to the four microbiota clusters (C1-C4, see Fig. 3). The host variables significantly associated with the axes are highlighted. MDS, multidimensional scaling.

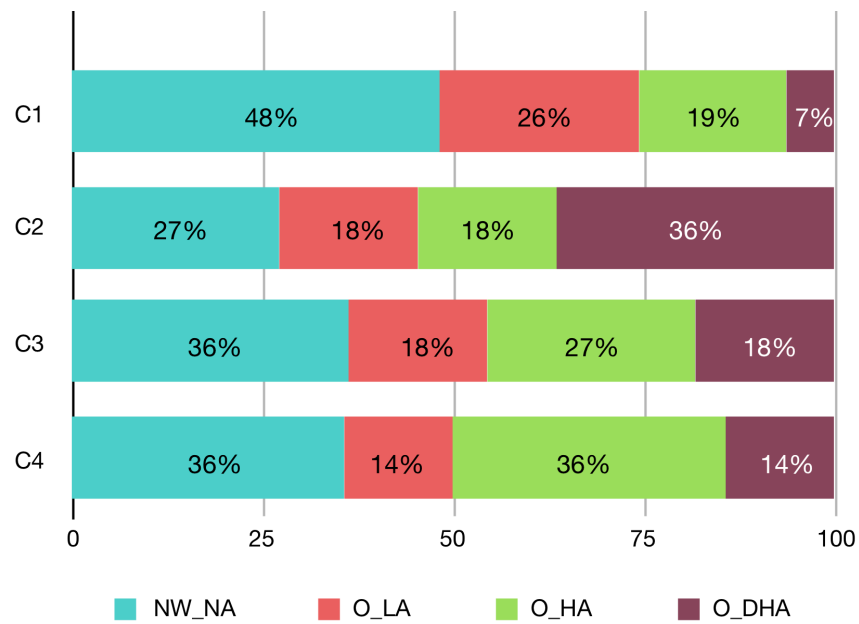

**Figure S3. Distribution of eating behavior-based study groups across the four microbiome clusters (C1-C4).** Women were stratified based on addictive eating behavior into 4 groups: NW\_NA (normal-weight, non-addicted), O\_LA (overweight/obese, low-addicted), O\_HA (overweight/obese, high-addicted), and O\_DHA (overweight/obese, high-addicted with food addiction diagnosis). See Methods for further details on stratification.

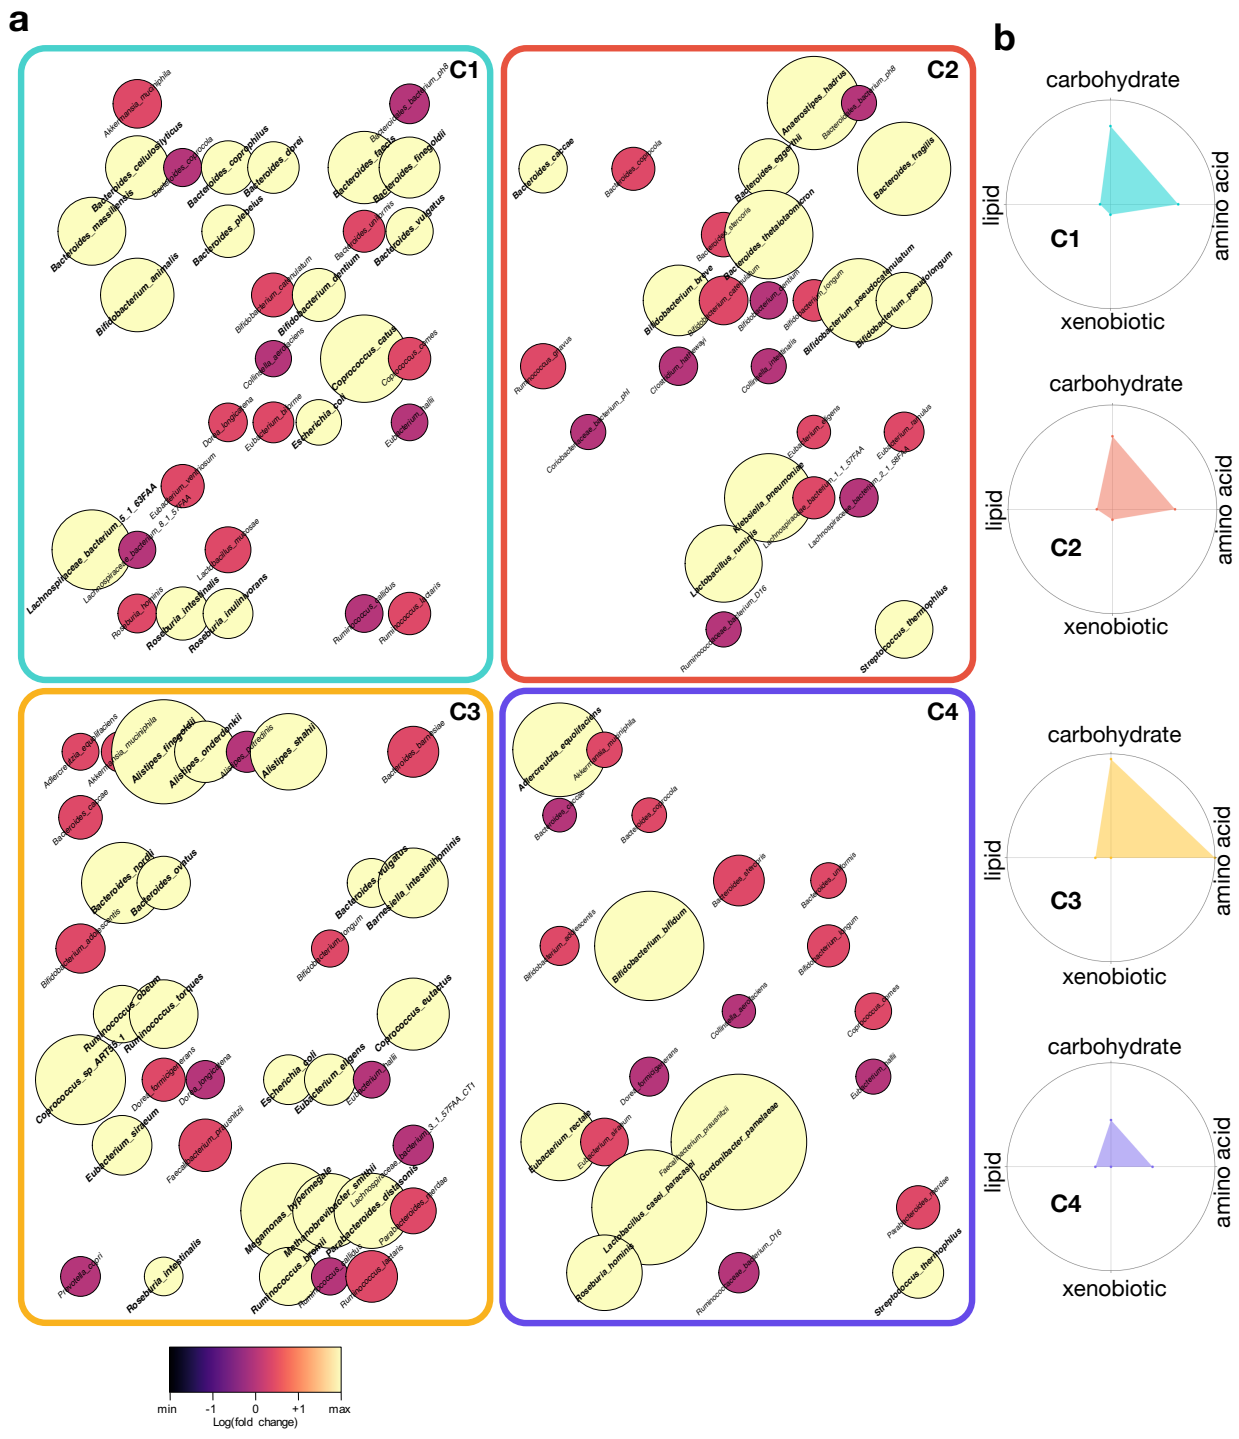

**Figure S4. The transcriptionally active fraction of the gut microbiome differs according to obesity and uncontrolled eating behavior.** (a) Bubble charts showing the transcriptionally active microbial species within the four microbiome configurations (clusters C1-C4). Circle sizes and colors indicate the transcriptional over-abundance of a given species compared to its average normalized abundance in the whole cohort using log<sub>2</sub> transformation. (b) Spider plots showing the number of active species for each metabolism (i.e., carbohydrate, lipid, amino acid and xenobiotic metabolism). Species were counted as “active” when present with log<sub>2</sub> normalized abundance > 1 in at least 1/3 of the pathways comprised in the specific metabolic category.



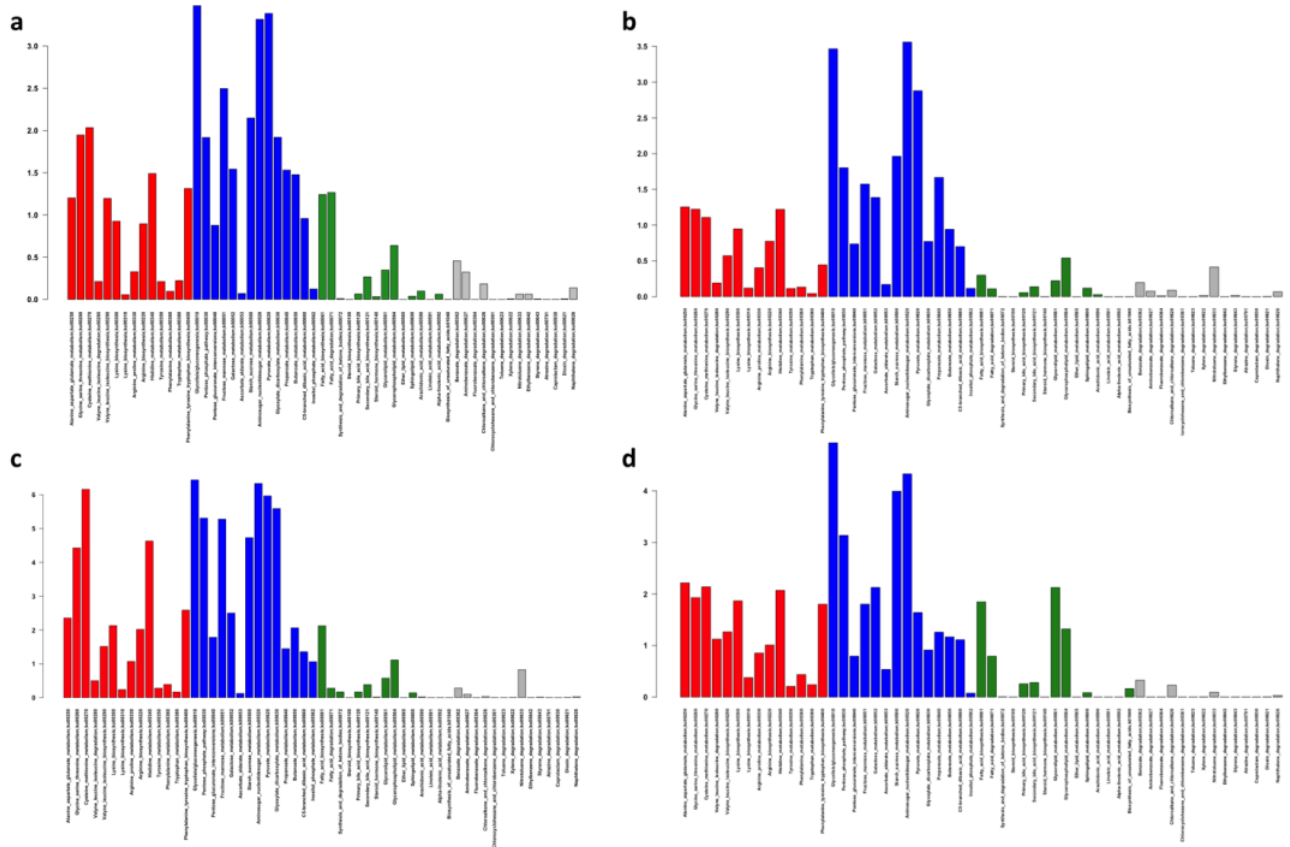

**Figure S6. Metabolic activities of the four microbiota clusters according to metatranscriptomic analysis.** Expression levels of the 57 identified KEGG pathways related to amino acid (red), carbohydrate (blue), lipid (green), and xenobiotic (grey) metabolisms that were most prevalently transcribed among the species detected by metagenomics, for the microbiome clusters C1 (a), C2 (b), C3 (c) and C4 (d).

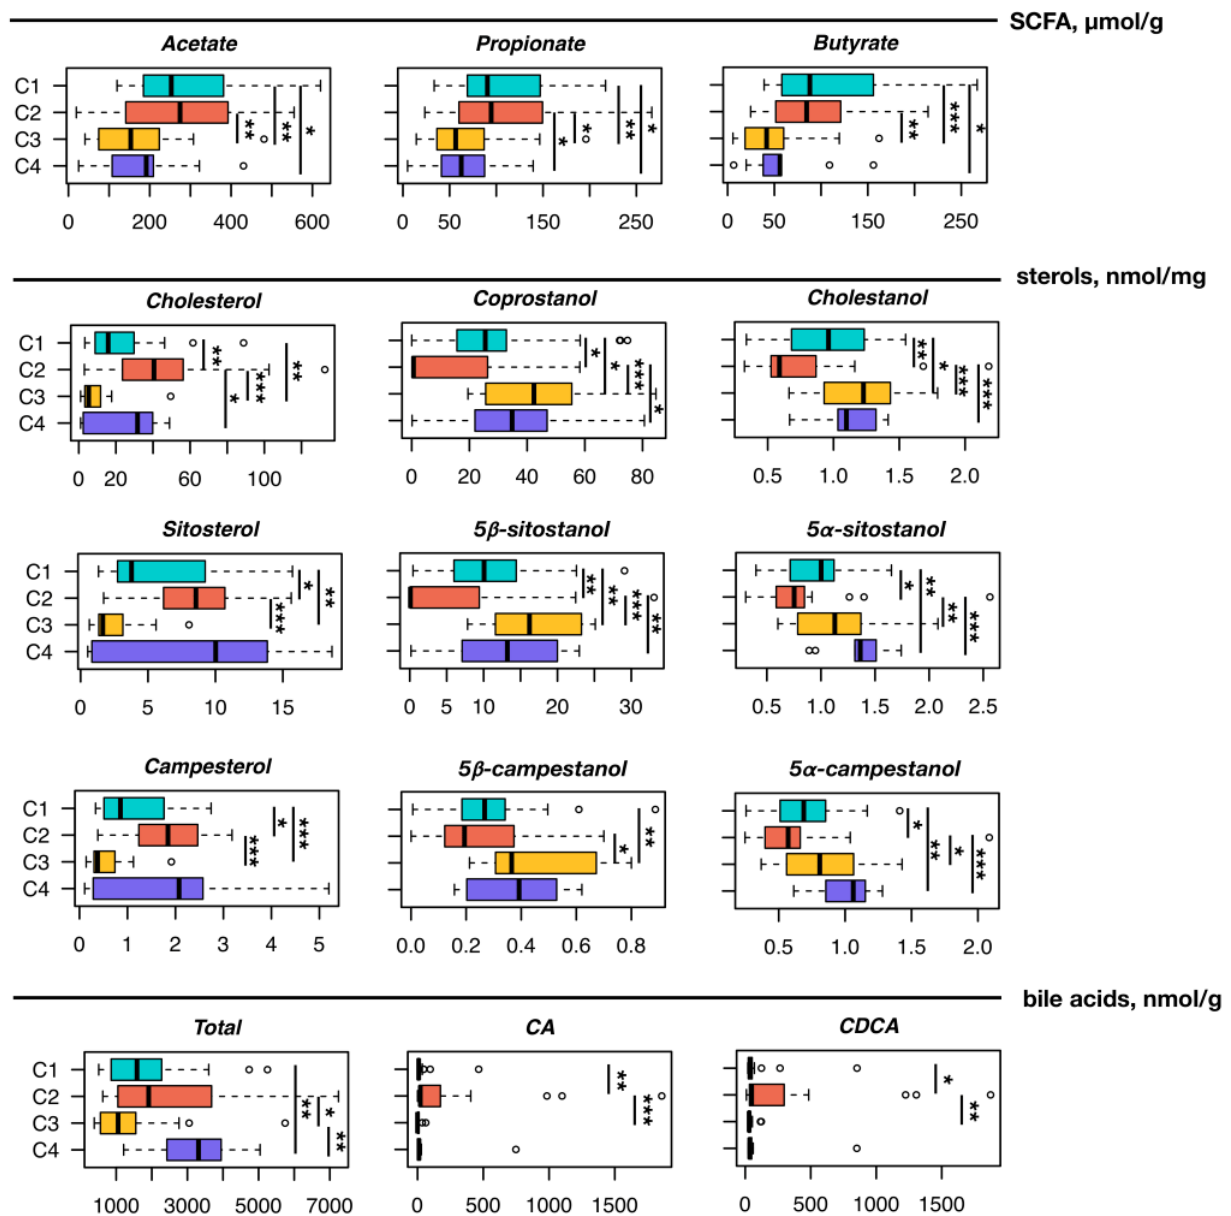

**Figure S7. Fecal lipidomic profiles of the four microbiota clusters (C1-C4).** Boxplots showing the amount distribution of short-chain fatty acids (SCFAs, upper panel), sterols (middle panel) and bile acids (lower panel) significantly different between the four microbiota clusters. CA, cholic acid; CDCA, chenodeoxycholic acid; GDCA, glycocholic acid; Glyco, glycoconjugates. See [50] for further details on fecal lipidomics analysis. \*,  $p \leq 0.05$ ; \*\*,  $p \leq 0.01$ ; \*\*\*,  $p \leq 0.001$ ; Wilcoxon test.



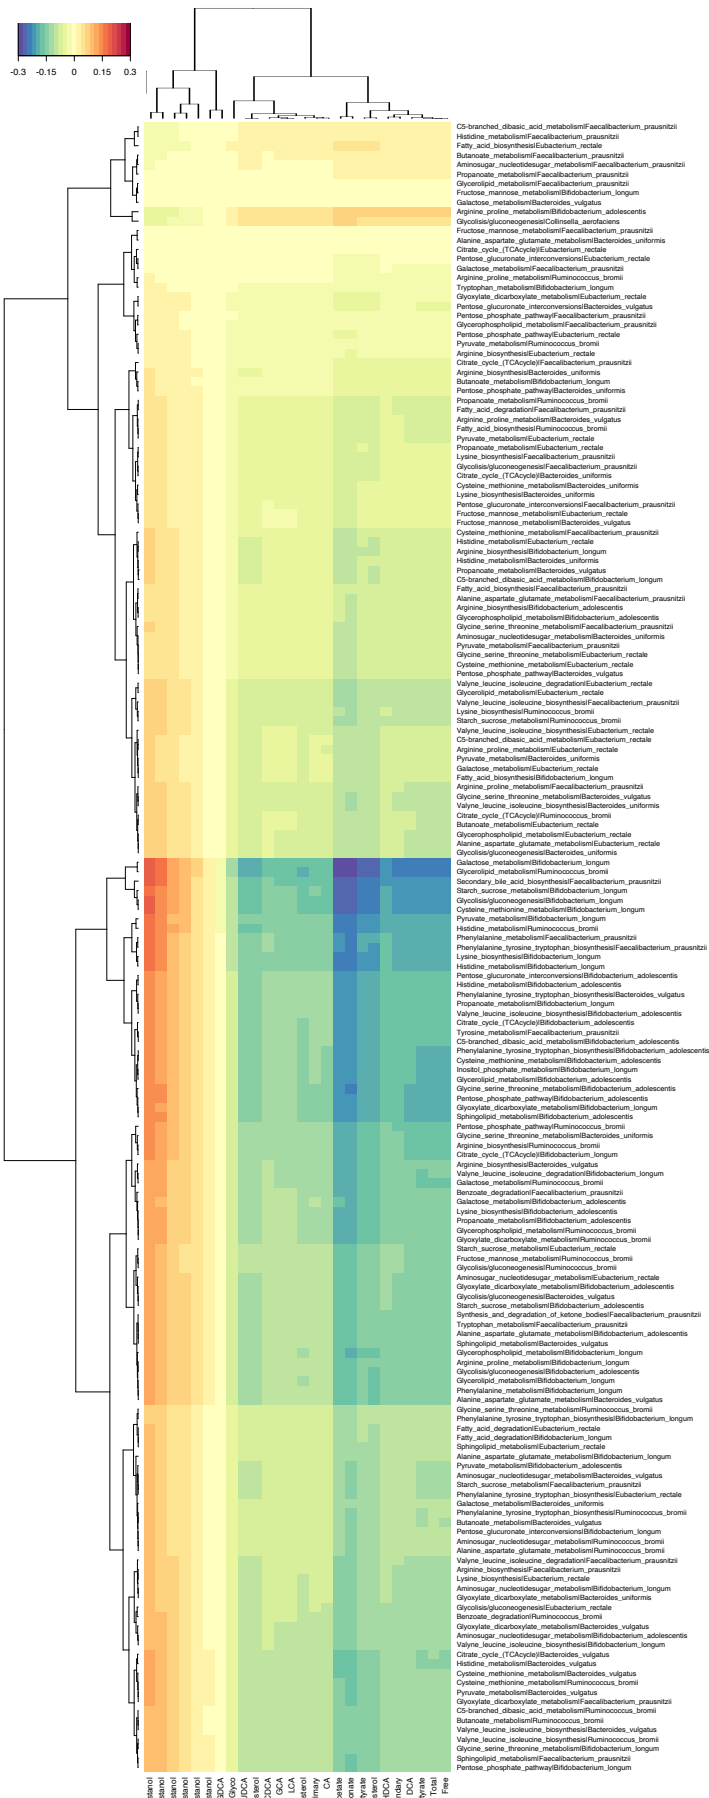

**Figure S8. Associations between the transcriptionally active fraction of the gut microbiome and lipidomics measures.** Hierarchical clustering obtained with complete linkage method and Pearson correlation as distance, performed on the sparse partial least square (sPLS) regression of transcriptionally active pathways and species of the gut microbiome and host lipids. CA, cholic acid; CDCA, chenodeoxycholic acid; DCA, deoxycholic acid; GCA, glycocholic acid; GDCA, glycodeoxycholic acid; HDCA, hyodeoxycholic acid; LCA, lithocholic acid; UDCA, ursodeoxycholic acid.

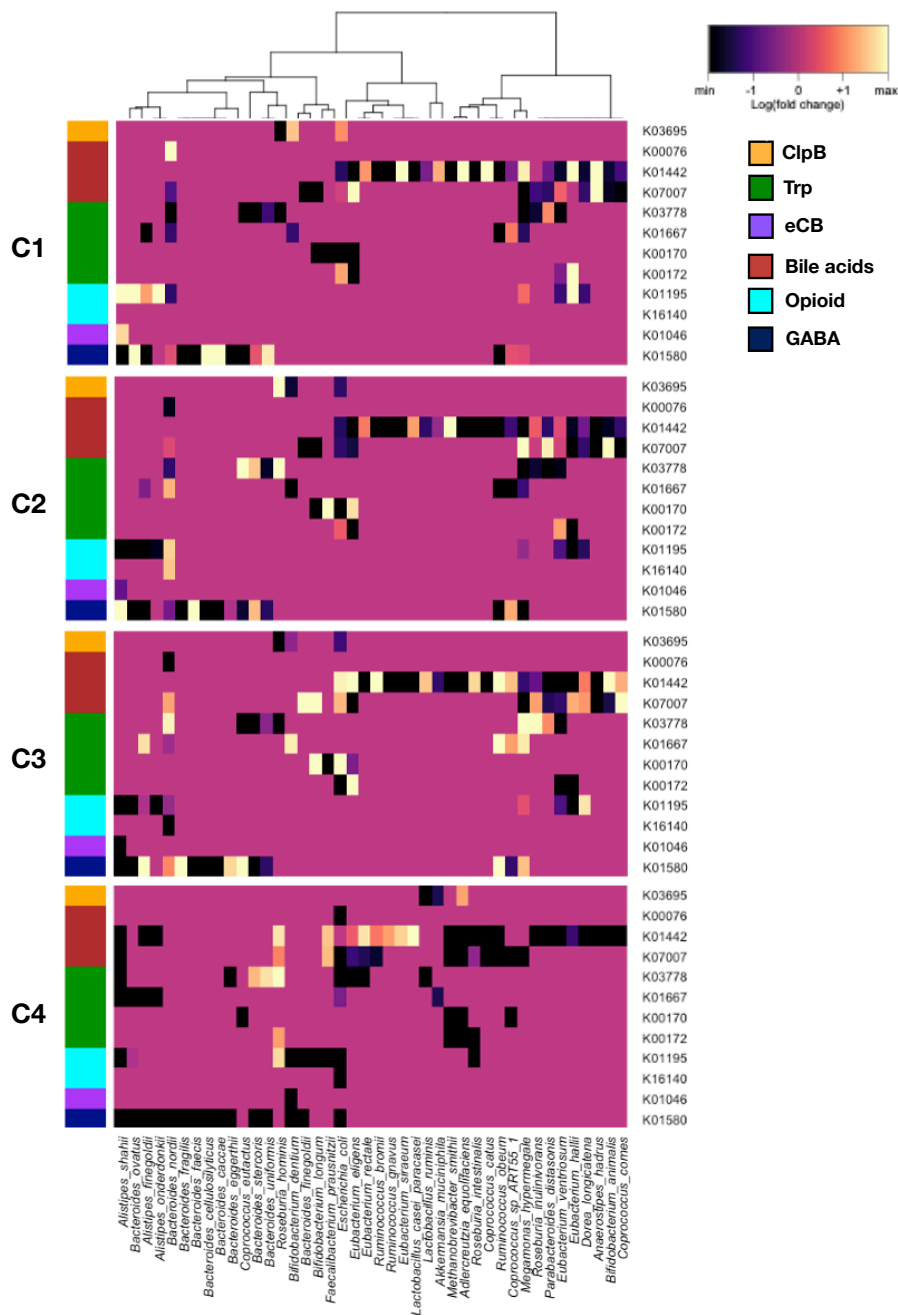

**Figure S9. Transcriptional activities of microbiome configurations specifically related to food intake, energy expenditure and neuroendocrine signaling.** Average RNA:DNA ratio for each cluster (C1-C4) with respect to the whole cohort, of a selection of key genes involved in ClpB (orange), bile acid (brown), tryptophan (green), opioid (cyan), eCB (violet), and GABA (navy) production, divided by the assigned microbial species. Phylogenetic tree on the top of the heatmap was built using hierarchical Ward linkage clustering based on the Spearman correlation coefficients of the average DNA-normalized transcript abundance profiles for the species with detectable transcriptomes in the whole cohort.

**Table S1. Genus-level distribution and differences in the gut microbiota profiles among the four clusters (C1-C4).** For each genus, the mean relative abundance and sem (standard error of the mean) are reported, along with Wilcoxon test *p* values (significant values in bold).

| Genus                        | relative abundances |        |         |        |         |        |         |        | p values        |                |                 |                 |               |                |
|------------------------------|---------------------|--------|---------|--------|---------|--------|---------|--------|-----------------|----------------|-----------------|-----------------|---------------|----------------|
|                              | mean C1             | sem C1 | mean C2 | sem C2 | mean C3 | sem C3 | mean C4 | sem C4 | C1 vs C2        | C1 vs C3       | C1 vs C4        | C2 vs C3        | C2 vs C4      | C3 vs C4       |
| <i>Anaerotruncus</i>         | 0.0038              | 0.0013 | 0.0049  | 0.0017 | 0.03    | 0.0077 | 0.019   | 0.0094 | 0.8             | <b>0.00004</b> | 0.07            | <b>0.0001</b>   | 0.1           | 0.1            |
| <i>Coprobacillus</i>         | 0.023               | 0.0094 | 0.032   | 0.013  | 0.048   | 0.021  | 0.2     | 0.11   | 0.7             | 0.6            | <b>0.03</b>     | 0.4             | <b>0.02</b>   | 0.2            |
| <i>Eggerthella</i>           | 0.026               | 0.011  | 0.32    | 0.081  | 0.054   | 0.034  | 0.13    | 0.048  | <b>8.00E-06</b> | 0.3            | <b>0.002</b>    | <b>0.0006</b>   | 0.3           | <b>0.03</b>    |
| <i>Butyricimonas</i>         | 0.034               | 0.0076 | 0.062   | 0.03   | 0.14    | 0.056  | 0.0054  | 0.0027 | <b>0.08</b>     | <b>0.03</b>    | <b>0.02</b>     | <b>0.002</b>    | 0.5           | <b>0.0009</b>  |
| <i>Lachnobacterium</i>       | 0.035               | 0.017  | 0.013   | 0.0061 | 0.081   | 0.058  | 0.0046  | 0.0027 | <b>0.03</b>     | 0.8            | <b>0.05</b>     | <b>0.03</b>     | 0.7           | <b>0.05</b>    |
| [ <i>Prevotella</i> ]        | 0.057               | 0.049  | 0       | 0      | 0.13    | 0.11   | 0       | 0      | 0.07            | 0.2            | 0.2             | <b>0.005</b>    | NA            | 0.06           |
| <i>Slackia</i>               | 0.059               | 0.019  | 0.042   | 0.021  | 0.18    | 0.093  | 0.16    | 0.11   | 0.1             | 0.1            | 0.4             | <b>0.007</b>    | 0.7           | 0.09           |
| <i>Desulfovibrio</i>         | 0.061               | 0.034  | 0.022   | 0.016  | 0.2     | 0.081  | 0.0062  | 0.0054 | 0.4             | 0.1            | 0.3             | <b>0.03</b>     | 0.7           | 0.06           |
| <i>Veillonella</i>           | 0.094               | 0.026  | 0.3     | 0.2    | 0.01    | 0.0033 | 0.024   | 0.014  | 0.5             | <b>0.0004</b>  | <b>0.009</b>    | <b>0.004</b>    | <b>0.05</b>   | 0.7            |
| <i>Adlercreutzia</i>         | 0.19                | 0.057  | 0.074   | 0.028  | 0.13    | 0.033  | 0.29    | 0.063  | <b>0.0002</b>   | 0.5            | <b>0.04</b>     | <b>0.005</b>    | <b>0.0001</b> | <b>0.02</b>    |
| <i>Turicibacter</i>          | 0.21                | 0.1    | 0.16    | 0.073  | 0.091   | 0.026  | 0.28    | 0.095  | <b>0.02</b>     | 0.5            | 0.3             | 0.2             | <b>0.04</b>   | 0.08           |
| <i>Catenibacterium</i>       | 0.26                | 0.17   | 0.13    | 0.13   | 0.5     | 0.29   | 0       | 0      | 0.4             | 0.1            | 0.1             | <b>0.01</b>     | 0.3           | <b>0.01</b>    |
| <i>Anaerostipes</i>          | 0.3                 | 0.042  | 0.19    | 0.043  | 0.23    | 0.057  | 0.24    | 0.082  | <b>0.02</b>     | 0.1            | 0.1             | 0.3             | 0.3           | 0.7            |
| <i>Parabacteroides</i>       | 0.4                 | 0.064  | 0.6     | 0.17   | 0.42    | 0.066  | 0.079   | 0.035  | 0.2             | 0.7            | <b>0.0001</b>   | 0.1             | 0.07          | <b>0.00004</b> |
| <i>Phascolarctobacterium</i> | 0.48                | 0.1    | 0.25    | 0.12   | 1.06    | 0.27   | 0.33    | 0.22   | <b>0.01</b>     | 0.2            | <b>0.05</b>     | <b>0.002</b>    | 0.8           | <b>0.01</b>    |
| <i>Roseburia</i>             | 0.62                | 0.11   | 0.46    | 0.099  | 0.21    | 0.049  | 0.24    | 0.061  | 0.1             | <b>0.001</b>   | <b>0.02</b>     | 0.4             | 0.8           | 0.4            |
| <i>Clostridium</i>           | 0.67                | 0.077  | 0.83    | 0.14   | 0.37    | 0.09   | 0.25    | 0.074  | 0.6             | <b>0.006</b>   | <b>0.002</b>    | 0.04            | <b>0.02</b>   | 0.4            |
| [ <i>Ruminococcus</i> ]      | 0.99                | 0.14   | 2.94    | 0.59   | 0.84    | 0.16   | 1.37    | 0.25   | <b>0.001</b>    | 0.4            | 0.1             | <b>0.0008</b>   | 0.1           | <b>0.04</b>    |
| <i>Akkermansia</i>           | 1.5                 | 0.31   | 0.39    | 0.21   | 6.74    | 1.71   | 4.9     | 1.88   | <b>0.00009</b>  | <b>0.03</b>    | 0.9             | <b>0.00006</b>  | <b>0.05</b>   | 0.3            |
| <i>Lachnospira</i>           | 1.54                | 0.36   | 1.48    | 0.41   | 1.13    | 0.22   | 0.32    | 0.14   | 0.3             | 0.8            | <b>0.0004</b>   | 0.4             | <b>0.04</b>   | <b>0.002</b>   |
| <i>Collinsella</i>           | 1.73                | 0.21   | 2.02    | 0.42   | 1.95    | 0.33   | 4.92    | 0.91   | 0.4             | 0.8            | <b>0.001</b>    | 0.5             | <b>0.003</b>  | <b>0.005</b>   |
| <i>Coprococcus</i>           | 1.75                | 0.3    | 0.33    | 0.074  | 2.38    | 0.5    | 0.94    | 0.31   | <b>3.00E-07</b> | 0.4            | 0.03            | <b>2.00E-06</b> | <b>0.03</b>   | <b>0.02</b>    |
| <i>Prevotella</i>            | 2.23                | 0.72   | 0.18    | 0.12   | 1.89    | 0.7    | 0.083   | 0.034  | <b>0.002</b>    | 0.6            | 0.08            | <b>0.0002</b>   | 0.3           | <b>0.02</b>    |
| <i>Bifidobacterium</i>       | 5.55                | 0.9    | 11.14   | 1.38   | 4.59    | 1.05   | 17.84   | 3.51   | <b>0.001</b>    | 0.4            | <b>0.0002</b>   | <b>0.00008</b>  | <b>0.05</b>   | <b>0.0002</b>  |
| <i>Ruminococcus</i>          | 5.87                | 0.46   | 2.45    | 0.71   | 5.36    | 0.91   | 6.47    | 1.11   | <b>1.00E-06</b> | 0.1            | 0.7             | <b>0.00009</b>  | <b>0.001</b>  | 0.3            |
| <i>Blautia</i>               | 7.33                | 0.81   | 10.68   | 1.51   | 3.86    | 0.61   | 8.39    | 1.32   | 0.1             | <b>0.001</b>   | 0.6             | <b>0.00007</b>  | 0.5           | <b>0.003</b>   |
| <i>Bacteroides</i>           | 8.44                | 0.98   | 9.07    | 1.62   | 7.68    | 1.82   | 2.84    | 1      | 0.5             | 0.2            | <b>0.0004</b>   | 0.9             | 0.09          | <b>0.02</b>    |
| <i>Faecalibacterium</i>      | 10.43               | 0.83   | 7.61    | 1.03   | 5.99    | 0.97   | 3.05    | 0.75   | <b>0.05</b>     | <b>0.0004</b>  | <b>6.00E-07</b> | 0.5             | <b>0.03</b>   | <b>0.04</b>    |

**Table S2. Food description and average frequency of daily consumption for each microbiota cluster (C1 to C4).**

| Food                      | Description                                     | Food category  | Microbiota group |       |       |       |
|---------------------------|-------------------------------------------------|----------------|------------------|-------|-------|-------|
|                           |                                                 |                | C1               | C2    | C3    | C4    |
| bisquits and sweet snacks | Biscuits, packaged cakes or pastries            | Snacks         | 0.385            | 0.417 | 0.215 | 0.567 |
| cheese                    | Grated, sliced or spreadable cheese             | Cheese         | 0.25             | 0.312 | 0.288 | 0.333 |
| chocolate                 | Chocolate candy and bars                        | Snacks         | 0.244            | 0.231 | 0.182 | 0.183 |
| eggs                      | Boiled or fried eggs                            | Eggs           | 0.11             | 0.099 | 0.092 | 0.088 |
| fried food                | Fried food                                      | Other          | 0.111            | 0.077 | 0.082 | 0.11  |
| fried potatoes            | Fried potatoes                                  | Vegetable      | 0.084            | 0.099 | 0.067 | 0.076 |
| homemade sandwiches       | Hamburger, hotdog, kebab, wrap, falafel         | Cereal         | 0.198            | 0.149 | 0.206 | 0.152 |
| ice cream                 | Ice cream, milk and fruit based bars            | Snacks         | 0.138            | 0.135 | 0.123 | 0.062 |
| meat                      | Fresh and fried meat                            | Meat Products  | 0.088            | 0.117 | 0.086 | 0.138 |
| milk and yoghurt          | Milk and plain sweetened yoghurt                | Dairy Products | 0.481            | 0.664 | 0.464 | 0.683 |
| not homemade sandwiches   | Hamburger, hotdog, kebab, wrap, falafel         | Cereal         | 0.076            | 0.064 | 0.092 | 0.112 |
| olive oil                 | Vegetable dressing                              | Fat and oils   | 0.658            | 0.784 | 0.561 | 0.776 |
| pizza                     | Pizza                                           | Cereal         | 0.146            | 0.14  | 0.185 | 0.133 |
| sausages                  | Cold cuts and preserved meat product            | Meat Products  | 0.038            | 0.072 | 0.029 | 0.043 |
| seasonings and condiments | Butter, margarine on bread, pesto, ragù         | Condiments     | 0.214            | 0.244 | 0.089 | 0.217 |
| slide ham                 | Cold cuts and preserved meat product            | Meat Products  | 0.116            | 0.139 | 0.12  | 0.167 |
| sweet and salty snacks    | Packaged cakes or savoury pastries and fritters | Snacks         | 0.204            | 0.244 | 0.155 | 0.16  |
| sweetened drinks          | Sweetened soft beverages                        | Drinks         | 0.118            | 0.195 | 0.092 | 0.1   |
| wine                      | Alcoholic beverages                             | Drinks         | 0.189            | 0.172 | 0.273 | 0.16  |

**Table S3. Summary of dietary groups and microbiota clusters for each of the 100 enrolled women.** Women were stratified based on addictive eating behavior into 4 groups: NW\_NA (normal-weight, non-addicted), O\_LA (overweight/obese, low-addicted), O\_HA (overweight/obese, high-addicted), and O\_DHA (overweight/obese, high-addicted with food addiction diagnosis). For microbiota clusters and dietary groups, see Fig. 3 and Fig. 5, respectively.

| SampleID | Group | Microbiota cluster | Diet group |
|----------|-------|--------------------|------------|
| NEU10B   | O_LA  | C3                 | D1         |
| NEU116B  | O_HA  | C2                 | D3         |
| NEU117B  | O_NA  | C4                 | D3         |
| NEU118B  | O_NA  | C2                 | D1         |
| NEU119B  | O_LA  | C2                 | D1         |
| NEU11B   | O_NA  | C4                 | D1         |
| NEU127B  | O_LA  | C4                 | D3         |
| NEU129B  | O_NA  | C2                 | D2         |
| NEU12B   | O_LA  | C2                 | D1         |
| NEU134B  | O_HA  | C3                 | D2         |
| NEU139B  | O_NA  | C1                 | D3         |
| NEU13B   | O_LA  | C1                 | D3         |
| NEU144B  | O_NA  | C3                 | D2         |
| NEU14B   | O_LA  | C4                 | D1         |
| NEU152B  | O_NA  | C1                 | D1         |
| NEU153B  | O_LA  | C4                 | D1         |
| NEU155B  | O_LA  | C3                 | D3         |
| NEU160B  | O_NA  | C2                 | D1         |
| NEU161B  | O_LA  | C1                 | D1         |
| NEU163B  | O_LA  | C4                 | D1         |
| NEU164B  | O_LA  | C2                 | D3         |
| NEU167B  | O_NA  | C3                 | D2         |
| NEU16B   | O_HA  | C2                 | D1         |
| NEU170B  | O_NA  | C1                 | D2         |
| NEU172B  | O_NA  | C2                 | D1         |
| NEU174B  | O_HA  | C2                 | D2         |
| NEU176B  | O_NA  | C1                 | D2         |
| NEU177B  | O_LA  | C3                 | D3         |
| NEU178B  | O_HA  | C3                 | D1         |
| NEU179B  | O_LA  | C1                 | D1         |
| NEU17B   | O_HA  | C2                 | D1         |
| NEU180B  | O_LA  | C1                 | D2         |
| NEU18B   | O_HA  | C1                 | D1         |
| NEU19B   | O_HA  | C3                 | D1         |
| NEU1B    | O_NA  | C3                 | D3         |
| NEU20B   | O_HA  | C3                 | D3         |
| NEU21B   | O_HA  | C4                 | D1         |
| NEU22B   | O_HA  | C2                 | D1         |
| NEU23B   | O_HA  | C2                 | D1         |
| NEU25B   | O_NA  | C1                 | D1         |
| NEU26B   | O_NA  | C1                 | D1         |
| NEU27B   | O_LA  | C3                 | D3         |
| NEU28B   | O_NA  | C1                 | D3         |
| NEU29B   | O_NA  | C2                 | D1         |
| NEU2B    | O_NA  | C2                 | D1         |
| NEU30B   | O_NA  | C1                 | D1         |
| NEU31B   | O_LA  | C1                 | D3         |
| NEU32B   | O_HA  | C3                 | D2         |
| NEU33B   | O_HA  | C3                 | D3         |
| NEU34B   | O_NA  | C2                 | D3         |
| NEU35B   | O_LA  | C2                 | D3         |
| NEU36B   | O_NA  | C2                 | D2         |
| NEU37B   | O_NA  | C2                 | D1         |
| NEU38B   | O_NA  | C2                 | D1         |
| NEU39B   | O_LA  | C2                 | D3         |
| NEU3B    | O_LA  | C1                 | D3         |
| NEU4B    | O_LA  | C4                 | D1         |
| NEU5B    | O_NA  | C2                 | D1         |
| NEU6B    | O_NA  | C2                 | D1         |
| NEU7B    | O_NA  | C3                 | D3         |
| NEU8B    | O_HA  | C1                 | D1         |
| NEU9B    | O_LA  | C2                 | D1         |

| SampleID | Group | Microbiota cluster | Diet group |
|----------|-------|--------------------|------------|
| NC120B   | NW_NA | C1                 | D1         |
| NC121B   | NW_NA | C2                 | D2         |
| NC122B   | NW_NA | C1                 | D3         |
| NC123B   | NW_NA | C1                 | D3         |
| NC124B   | NW_NA | C2                 | D3         |
| NC125B   | NW_NA | C2                 | D3         |
| NC126B   | NW_NA | C1                 | D1         |
| NC128B   | NW_NA | C2                 | D1         |
| NC130B   | NW_NA | C2                 | D1         |
| NC131B   | NW_NA | C1                 | D1         |
| NC132B   | NW_NA | C1                 | D3         |
| NC133B   | NW_NA | C3                 | D3         |
| NC135B   | NW_NA | C2                 | D1         |
| NC136B   | NW_NA | C1                 | D1         |
| NC137B   | NW_NA | C4                 | D2         |
| NC138B   | NW_NA | C4                 | D1         |
| NC140B   | NW_NA | C1                 | D3         |
| NC141B   | NW_NA | C3                 | D2         |
| NC142B   | NW_NA | C1                 | D2         |
| NC143B   | NW_NA | C4                 | D2         |
| NC145B   | NW_NA | C1                 | D2         |
| NC146B   | NW_NA | C3                 | D3         |
| NC147B   | NW_NA | C1                 | D1         |
| NC148B   | NW_NA | C2                 | D2         |
| NC149B   | NW_NA | C4                 | D1         |
| NC150B   | NW_NA | C3                 | D1         |
| NC151B   | NW_NA | C1                 | D2         |
| NC154B   | NW_NA | C4                 | D1         |
| NC156B   | O_HA  | C4                 | D3         |
| NC157B   | NW_NA | C3                 | D1         |
| NC159B   | NW_NA | C1                 | D2         |
| NC162B   | NW_NA | C3                 | D1         |
| NC165B   | NW_NA | C2                 | D2         |
| NC166B   | NW_NA | C1                 | D1         |
| NC168B   | NW_NA | C3                 | D2         |
| NC171B   | NW_NA | C1                 | D1         |
| NC173B   | NW_NA | C3                 | D2         |
| NC175B   | NW_NA | C2                 | D1         |



**Table S5. Summary of the main distinctive features of the four microbiota clusters in terms of clinical, dietary and lipidomic profiles.** BITE, Bulimic Investigatory Test Edinburgh; NDT, non-distinctive tracts; SCFAs, short-chain fatty acids.

|                                 | microbiota profile |                                        |                                |                                               |
|---------------------------------|--------------------|----------------------------------------|--------------------------------|-----------------------------------------------|
|                                 | C1                 | C2                                     | C3                             | C4                                            |
| <b>clinical characteristics</b> | NDT                | ↑ uric acid, BITE severity score       | NDT                            | ↑ BITE symptoms score<br>↓ uric acid          |
| <b>diet</b>                     | ↑ fiber intake     | ↑ energy intake<br>↓ fiber, fat intake | NDT                            | ↑ energy, carbohydrate intake<br>↓ fat intake |
| <b>lipidomics</b>               | ↑ SCFAs            | ↑ SCFAs, cholesterol, bile acids       | ↑ converted sterols<br>↓ SCFAs | ↑ bile acids<br>↓ SCFAs                       |
